# Supplementary material for: Development of a Peptide-Based Nano-Sized Cathepsin B Inhibitor for Anticancer Therapy
Source: Pharmaceutics. 2023 Apr 3;15(4):1131. doi: 10.3390/pharmaceutics15041131 (PMC10141979; doi:10.3390/pharmaceutics15041131)
Supplement: Supplementary file 1 [file pharmaceutics-15-01131-s001.zip › pharmaceutics-2268258-supplementary.pdf]

## SUPPORTING INFORMATION

### Development of a Peptide-based Nano-sized Cathepsin B Inhibitor for Anticancer Therapy

*So-Hyeon Park<sup>1,‡</sup>, Jun-Hyuck Lee<sup>1,‡</sup>, Seong-Bin Yang<sup>1</sup>, Dong-Nyeong Lee<sup>1</sup>, Tae-Bong Kang<sup>1</sup>  
and Jooho Park<sup>1, 2\*</sup>*

<sup>1</sup>Department of Applied Life Science, Graduate School, BK21 Program, Konkuk University,  
Chungju 27478, Republic of Korea

<sup>2</sup>Center for Metabolic Diseases, Konkuk University, Chungju 27478, Republic of Korea

<sup>‡</sup>These authors contributed equally to this work

**\*Corresponding author:** (Phone) +82-43-840-3574; (E-mail) pkjhdn@kku.ac.kr

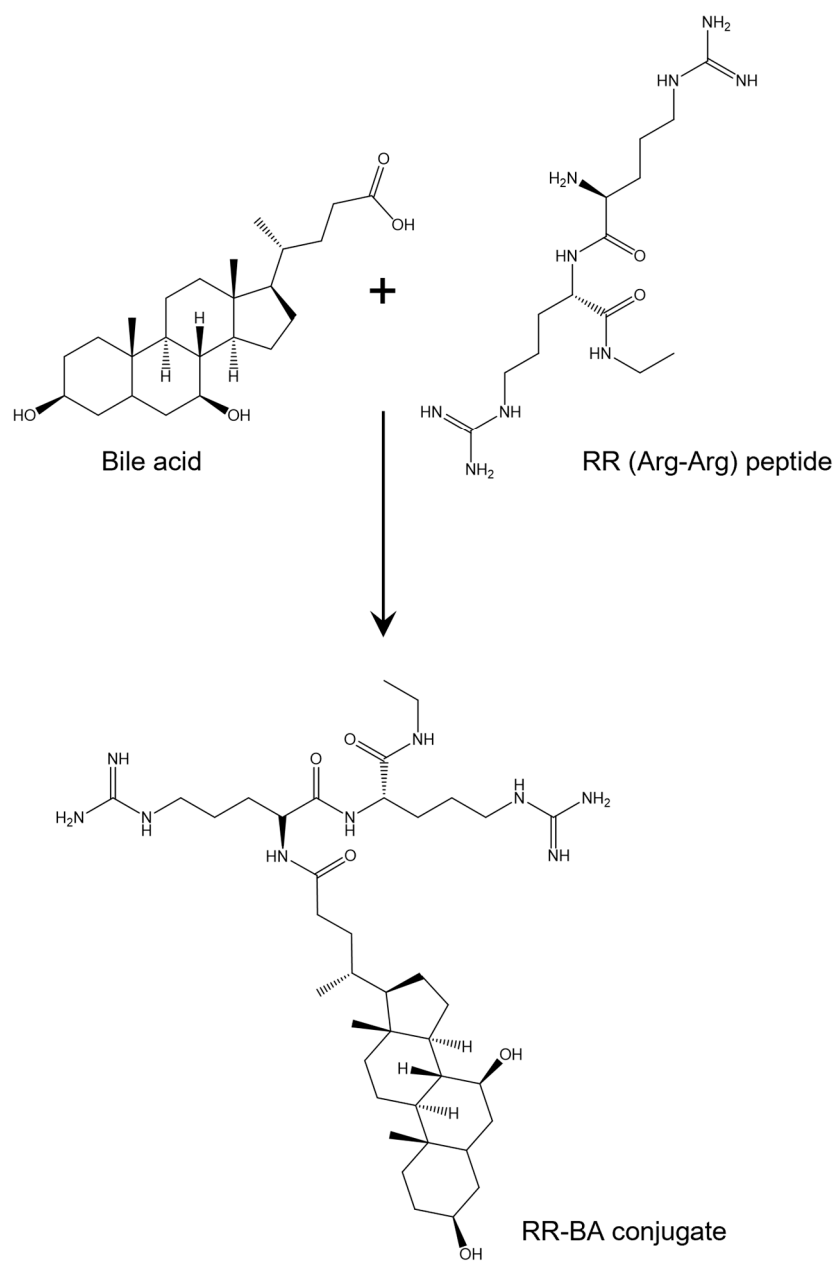

**Figure S1.** The chemical synthesis of RR-BA conjugate by using RR peptide and bile acid

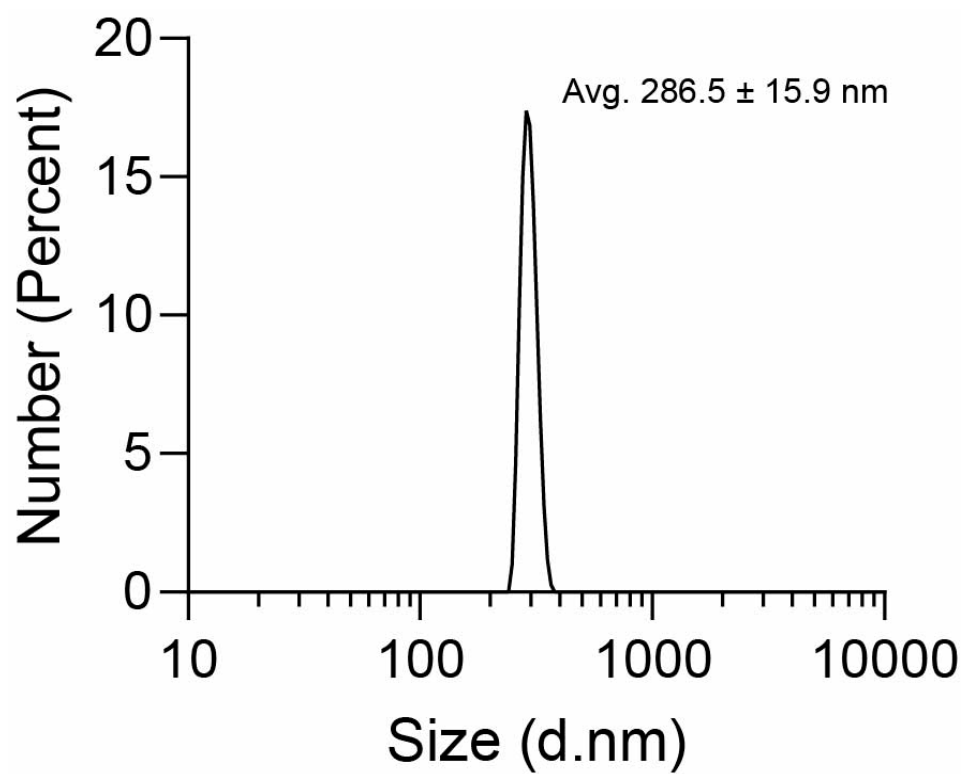

**Figure S2.** Size distribution analysis by dynamic light scattering (DLS). RR-BA were dispersed in normal saline (0.9% NaCl) thoroughly via sonication and vortexing, and RR-BA was measured at 1 mg/mL.

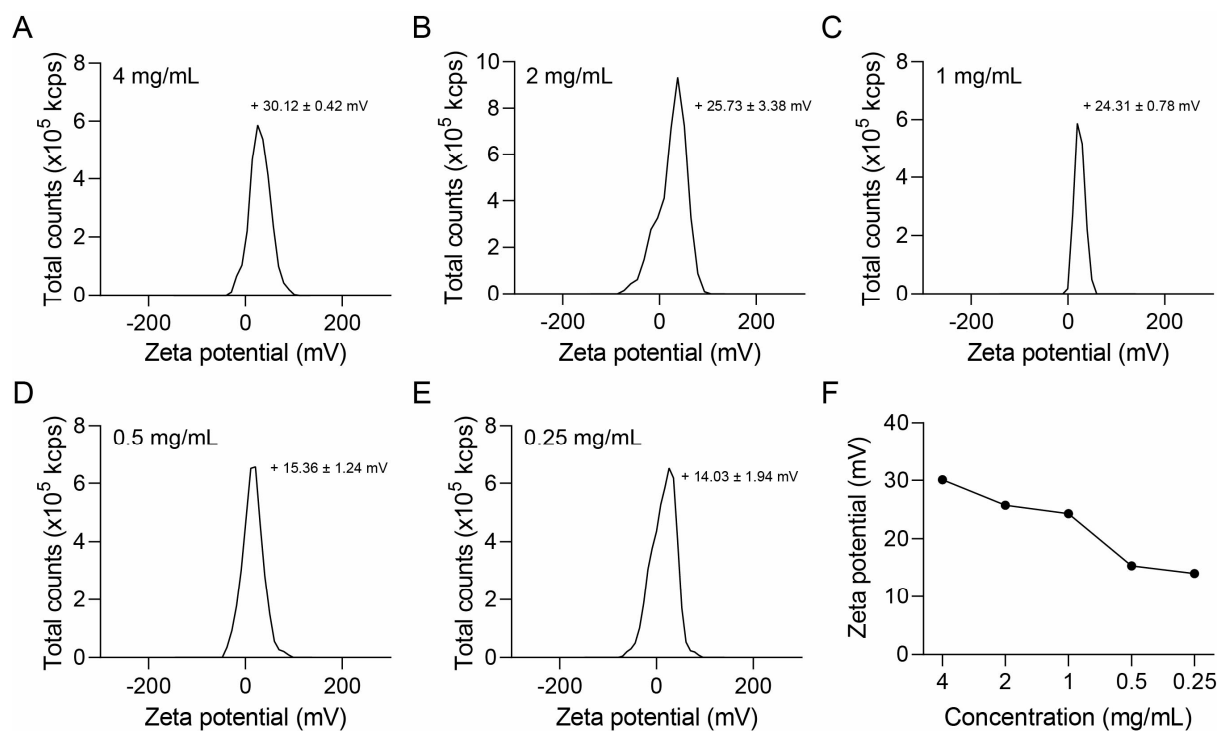

**Figure S3.** Determining the zeta potential of RR-BA. RR-BA is diluted in normal saline (0.9% NaCl) as in (A) 4 mg/mL, (B) 2 mg/mL, (C) 1 mg/mL, (D) 0.5 mg/mL and (E) 0.25 mg/mL final concentration. (F) Zeta potential value of various concentrations of RR-BA.

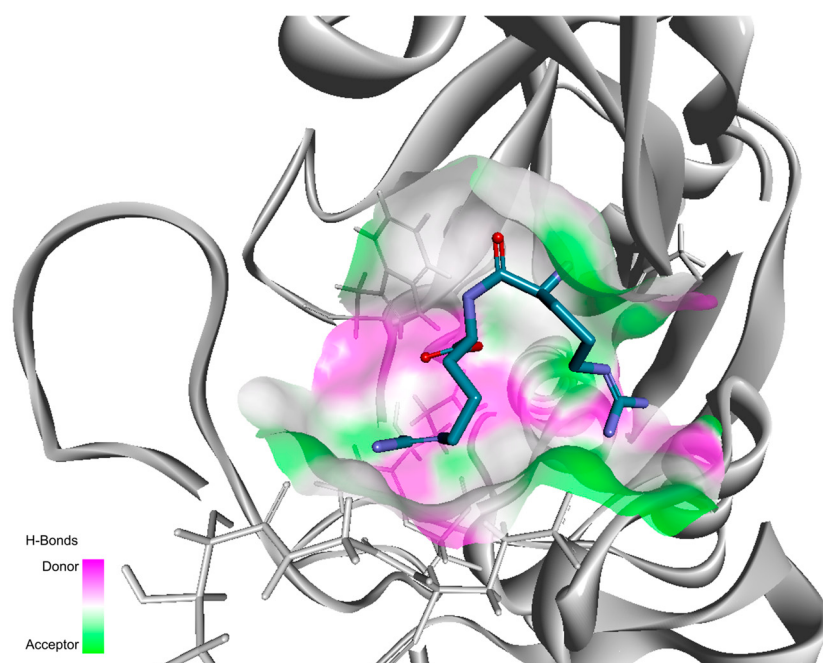

**Figure S4.** In silico docking position of RR-BA at cathepsin B binding site

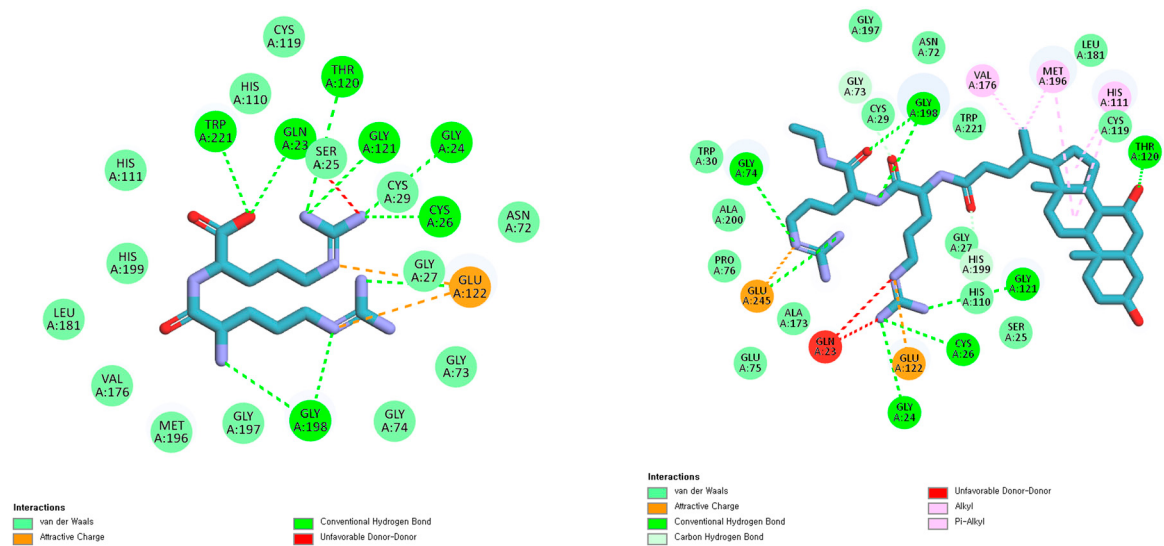

**Figure S5.** Molecular interaction analysis of RR peptide (left) and RR-BA (right) with cathepsin B
